# Supplementary material for: Anti-Obesity Effect of Different Opuntia stricta var. dillenii’s Prickly Pear Tissues and Industrial By-Product Extracts in 3T3-L1 Mature Adipocytes
Source: MDPI journal article supplement (doi:10.3390/nu16040499), 2024-02-09
Supplement: s1 [file s1]

**Table S1.** HPLC retention time (Rt), maximum absorption ( $\lambda_{\text{max}}$ ) and m/z of the identified major bioactive compounds from *Opuntia stricta* var. *Dillenii* whole fruit according to Gómez-López et al. (2021).

| Peak* | t <sub>R</sub> (min) | Compounds                                                        | UV $\lambda_{\text{max}}$ (nm) | [M-H] <sup>+</sup> | [M-H] <sup>-</sup> | MS/MS (m/z)             |
|-------|----------------------|------------------------------------------------------------------|--------------------------------|--------------------|--------------------|-------------------------|
| 1     | 7.880                | Piscidic acid                                                    | 272                            |                    | 255                | 193, 165, 135, 119, 107 |
| 2     | 9.947                | Betanin                                                          | 535                            | 551                |                    | 390, 389                |
| 3     | 14.176               | Isobetanin                                                       | 535                            | 551                |                    | 390, 389                |
| 4     | 24.171               | Betanidin                                                        | 538                            | 389                |                    | 345, 150                |
| 5     | 25.049               | 6'-O-sinapoyl-O-gompherin                                        | 539                            |                    | 755                | 225                     |
| 6     | 27.186               | 2'-O-apiosyl-4-O-phylllocactin                                   | 537                            |                    | 767                | 551                     |
| 7     | 25.140               | 5''-O-E-sinapoyl-2'-apyosil-phylllocactin                        | 248,330,540                    |                    | 975                | ---                     |
| 8     | 30.410               | Neobetanin                                                       | 467                            |                    | 549                | 387                     |
| 9     | 34.610               | Quercetin-3-O-rhamnosyl-rutinoside (QG3)                         | 358                            | 757                |                    | 611, 303                |
| 10    | 38.184               | Quercetin glycoside(QG1) - Quercetin hexosyl pentosyl rhamnoside | 255, 358                       | 426                |                    | 303, 191, 120           |
| 11    | 38.731               | Quercetin glycoside(QG2) - Quercetin hexose pentoside            | 255, 353                       | 653                |                    | 303, 177                |
| 12    | 39.677               | Isorhamnetin glucoxyl-rhamnosyl-rhamnoside(IG1)                  | 256, 356                       | 771                |                    | 625, 317, 85            |
| 13    | 42.182               | Isorhamnetin glucoxyl-rhamnosyl-pentoside(IG2)                   | 254, 356                       | 757                |                    | 317, 167, 86            |

All characterisation was done on a previous study (Gomez-Lopez et al., 2021)

\* Peak numbers are according to Figure S1
