# Supplementary material for: Anti-Obesity Effect of Different Opuntia stricta var. dillenii’s Prickly Pear Tissues and Industrial By-Product Extracts in 3T3-L1 Mature Adipocytes
Source: MDPI journal article supplement (doi:10.3390/nu16040499), 2024-02-09
Supplement: s1 [file s1]

**Table S2.** Antioxidant activities (ORAC and LOX-FL) of *Opuntia stricta* var. *dillenii*'s whole fruit, tissues (peel, and pulp) and by-product (bagasse).

| Biological activity                                                    | <i>Opuntia strcita</i> var. <i>Dillenii</i> |                                 |                                 |                                |
|------------------------------------------------------------------------|---------------------------------------------|---------------------------------|---------------------------------|--------------------------------|
|                                                                        | Whole fruit                                 | Peel                            | Pulp                            | Bagasse                        |
| <b>Antioxidant (<math>\mu\text{mol Trolox eq/g Dry weight}</math>)</b> |                                             |                                 |                                 |                                |
| ORAC                                                                   | 219.56 $\pm$ 17.09 <sup>a</sup>             | 122.97 $\pm$ 0.73 <sup>b</sup>  | 255.04 $\pm$ 3.81 <sup>a</sup>  | 211.31 $\pm$ 0.47 <sup>a</sup> |
| LOX-FL                                                                 | 429.51 $\pm$ 54.64 <sup>a</sup>             | 404.12 $\pm$ 42.27 <sup>a</sup> | 480.50 $\pm$ 22.83 <sup>a</sup> | 438.15 $\pm$ 8.67 <sup>a</sup> |

Results were expressed as mean  $\pm$  standard deviation (n = 3). This came from obtaining at least two independent extracts (n = 2) and performing the biological activity determinations of each time (n = 2). Superscript letters indicate statistically significant differences ( $p \leq 0.05$ ) between different OPD tissues
