# Supplementary material for: Anti-Obesity Effect of Different Opuntia stricta var. dillenii’s Prickly Pear Tissues and Industrial By-Product Extracts in 3T3-L1 Mature Adipocytes
Source: MDPI journal article supplement (doi:10.3390/nu16040499), 2024-02-09
Supplement: s1 [file s1]

**Table S3.** Effects of 10, 25, 50 and 100 µg/mL of extracts from *Opuntia stricta* var. *dilenii* whole fruit, peel, pulp and bagasse tissues on triacylglycerol content (%) of 3T3-L1 mature adipocytes treated for 24 h

| Trygliceride content (%) |                                            |                            |                            |                            |
|--------------------------|--------------------------------------------|----------------------------|----------------------------|----------------------------|
| Doses                    | <i>Opuntia stricta</i> var. <i>dilenii</i> |                            |                            |                            |
|                          | Whole fruit                                | Peel                       | Pulp                       | Bagasse                    |
| 10 µg/mL                 | 84.38 ± 10.75 <sup>cb</sup>                | 120.65 ± 4.14 <sup>a</sup> | 89.55 ± 6.52 <sup>a</sup>  | 111.52 ± 4.13 <sup>a</sup> |
| 25 µg/mL                 | 107.08 ± 10.22 <sup>a</sup>                | 90.08 ± 14.52 <sup>a</sup> | 85.36 ± 4.86 <sup>a</sup>  | 85.18 ± 5.34 <sup>a</sup>  |
| 50 µg/mL                 | 72.63 ± 7.20 <sup>c*</sup>                 | 76.39 ± 5.72 <sup>b*</sup> | 62.65 ± 2.48 <sup>b*</sup> | 73.37 ± 9.42 <sup>a</sup>  |
| 100 µg/mL                | 65.44 ± 8.46 <sup>c*</sup>                 | 78.09 ± 4.80 <sup>b*</sup> | 65.84 ± 2.43 <sup>b*</sup> | 88.10 ± 10.31 <sup>a</sup> |

Control represent 100% of accumulation. Results were expressed as mean ± standard deviation (n = 3). Superscript letters indicate statistically significant differences (p ≤ 0.05) between treatments in the same tissue. (\*) Indicates significant differences (p ≤ 0.05) between different OPD tissues and control.
